# Supplementary material
Source: PubMed Central journal article supplement (PMC11167530)
Supplement: NIHMS1973623-supplement-supplemental_data.pdf [file NIHMS1973623-supplement-supplemental_data.pdf]

Stratification by Obesity Class, Rather than Age, Can Identify a Higher Percent of Children at Risk for NAFLD and Metabolic Dysfunction.

Aurelia Radulescu<sup>1</sup>, Adam J. Dugan<sup>2</sup>, Mary Killian<sup>3</sup>, Suzanna L. Attia<sup>4</sup>, Marialena Mouzaki<sup>5</sup>, George J. Fuchs<sup>4</sup>, Rohit Kohli<sup>6</sup>, Henrietta Bada<sup>1</sup>, Philip A. Kern<sup>7</sup>, Samir Softic<sup>4,8,9</sup>

<sup>1</sup> Department of Pediatrics, University of Kentucky College of Medicine and Kentucky Children's Hospital. Lexington, KY

<sup>2</sup> Department of Biostatistics, College of Public Health, University of Kentucky, Lexington, KY

<sup>3</sup> Department of Pediatrics, Vanderbilt University Medical Center, Nashville, TN

<sup>4</sup> Department of Pediatrics, Division of Pediatric Gastroenterology, Hepatology, and Nutrition, University of Kentucky, College of Medicine, Lexington, KY

<sup>5</sup> Steatohepatitis Center, Cincinnati Children's Hospital Medical Center, University of Cincinnati, Cincinnati, OH.

<sup>6</sup> Division of Gastroenterology, Hepatology and Nutrition, Children's Hospital Los Angeles, CA

<sup>7</sup> Department of Medicine, Division of Endocrinology, University of Kentucky College of Medicine. Lexington, KY

<sup>8</sup> Department of Pharmacology and Nutritional Sciences, University of Kentucky College of Medicine, Lexington, KY

<sup>9</sup> Section on Integrative Physiology and Metabolism, Joslin Diabetes Center, Harvard Medical School, Boston, MA.

Keywords: ALT, NAFLD, Pediatric, obesity, diabetes, dyslipidemia.

Running Title: Obesity Class v. Age in Peds NAFLD

Corresponding author:

Samir Softic, MD  
Assistant Professor of Pediatrics  
University of Kentucky  
900 South Limestone  
Lexington, KY 40536  
Phone: (859) 218-1379  
Fax: (859) 257-7799  
E-mail: samir.softic@uky.edu

Supplemental table 1:

|                                         | Boys Stratified by Abnormal ALT Status |                    |                    |         |
|-----------------------------------------|----------------------------------------|--------------------|--------------------|---------|
|                                         | All Males                              | No                 | Yes                | p-value |
| <b>Number of Patients</b>               | 296                                    | 135                | 161                |         |
| <b>Age group, % (N/T)</b>               |                                        |                    |                    | 0.134   |
| 2-5                                     | 13.2%<br>(39/296)                      | 59.0%<br>(23/39)   | 41.0%<br>(16/39)   |         |
| 6-9                                     | 24.7%<br>(73/296)                      | 47.9%<br>(35/73)   | 52.1%<br>(38/73)   |         |
| ≥10                                     | 62.2%<br>(184/296)                     | 41.8%<br>(77/184)  | 58.2%<br>(107/184) |         |
| <b>Obesity Class, % (N/T)</b>           |                                        |                    |                    | <0.001  |
| Class I                                 | 16.2%<br>(48/296)                      | 62.5%<br>(30/48)   | 37.5%<br>(18/48)   |         |
| Class II                                | 27.7%<br>(82/296)                      | 50.0%<br>(41/82)   | 50.0%<br>(41/82)   |         |
| Class III                               | 56.1%<br>(166/296)                     | 38.6%<br>(64/166)  | 61.4%<br>(102/166) |         |
| ≥ Class II, % (N/T)                     | 83.7%<br>(248/296)                     | 42.3%<br>(105/248) | 57.6%<br>(143/248) | 0.016   |
| <b>Diabetes risk % (N/T)</b>            | 35.4%<br>(104/294)                     | 42.3%<br>(44/104)  | 57.6%<br>(60/104)  | 0.057   |
| <b>Increased BP, % (N/T)</b>            | 19.5%<br>(38/195)                      | 44.7%<br>(17/38)   | 55.2%<br>(21/38)   | 0.905   |
| <b>Low HDL, % (N/T)</b>                 | 45.5%<br>(132/290)                     | 40.1%<br>(53/132)  | 59.8%<br>(79/132)  | 0.082   |
| <b>High TG, % (N/T)</b>                 | 38.1%<br>(113/290)                     | 31.6%<br>(42/133)  | 45.2%<br>(71/157)  | 0.024   |
| <b>Metabolic Abnormalities, % (N/T)</b> |                                        |                    |                    |         |
| 0                                       | 5.5%<br>(16/296)                       | 67.8%<br>(11/16)   | 31.2%<br>(5/16)    |         |
| 1                                       | 32.0%<br>(95/296)                      | 54.7%<br>(52/95)   | 45.2%<br>(43/95)   |         |
| 2                                       | 33.1%<br>(98/296)                      | 43.8%<br>(43/98)   | 56.1%<br>(55/98)   |         |
| 3                                       | 22.9%<br>(68/296)                      | 35.3%<br>(24/68)   | 64.7%<br>(44/68)   |         |
| 4                                       | 6.4%<br>(19/296)                       | 26.3%<br>(5/19)    | 73.7%<br>(14/19)   |         |
| ≥3 Metabolic Abnormalities, % (N/T)     | 29.3%<br>(87/296)                      | 33.3%<br>(29/87)   | 66.7%<br>(58/87)   | 0.009   |

Supplemental table 2:

|                                            | Girls Stratified by Abnormal ALT Status |                    |                    |         |
|--------------------------------------------|-----------------------------------------|--------------------|--------------------|---------|
|                                            | All Female                              | No                 | Yes                | p-value |
| <b>Number of Patients</b>                  | 333                                     | 170                | 163                |         |
| <b>Age group, % (N/T)</b>                  |                                         |                    |                    | 0.007   |
| <b>2-5</b>                                 | 11.1%<br>(37/333)                       | 35.2%<br>(13/37)   | 64.8%<br>(24/37)   |         |
| <b>6-9</b>                                 | 32.1%<br>(107/333)                      | 43.9%<br>(47/107)  | 56.1%<br>(60/107)  |         |
| <b>≥10</b>                                 | 56.8%<br>(189/333)                      | 58.2%<br>(110/189) | 41.8%<br>(79/189)  |         |
| <b>Obesity Class, % (N/T)</b>              |                                         |                    |                    | <0.001  |
| <b>Class I</b>                             | 19.2%<br>(64/333)                       | 71.9%<br>(46/64)   | 28.1%<br>(18/64)   |         |
| <b>Class II</b>                            | 33.6%<br>(112/333)                      | 55.4%<br>(62/112)  | 44.6%<br>(50/112)  |         |
| <b>Class III</b>                           | 47.1%<br>(157/333)                      | 39.5%<br>(62/157)  | 60.5%<br>(95/157)  |         |
| <b>≥ Class II, % (N/T)</b>                 | 80.7%<br>(269/333)                      | 46.1%<br>(124/269) | 53.9%<br>(145/269) | <0.001  |
| <b>Diabetes risk % (N/T)</b>               | 31.1%<br>(103/331)                      | 48.5%<br>(50/103)  | 51.4%<br>(53/103)  | 0.840   |
| <b>Increased BP, % (N/T)</b>               | 11.%<br>(30/262)                        | 40.0%<br>(12/30)   | 60.0%<br>(18 /30)  | 0.270   |
| <b>Low HDL, % (N/T)</b>                    | 43.6%<br>(142/326)                      | 44.4%<br>(63/142)  | 55.6%<br>(79/142)  | 0.001   |
| <b>High TG, % (N/T)</b>                    | 43.8%<br>(142/324)                      | 38.0%<br>(54/142)  | 62.0%<br>(88/142)  | <0.001  |
| <b>Metabolic Abnormalities, % (N/T)</b>    |                                         |                    |                    |         |
| <b>0</b>                                   | 7.8%<br>(26/333)                        | 80.8%<br>(21/26)   | 19.2%<br>(5/26)    |         |
| <b>1</b>                                   | 28.8%<br>(96/333)                       | 64.6%<br>(62/96)   | 35.4%<br>(34/96)   |         |
| <b>2</b>                                   | 38.4%<br>(121/333)                      | 49.6%<br>(60/121)  | 50.4%<br>(61/121)  |         |
| <b>3</b>                                   | 22.2%<br>(74/333)                       | 35.1%<br>(26/74)   | 64.9%<br>(48/74)   |         |
| <b>4</b>                                   | 3.9%<br>(13/333)                        | 7.7%<br>(1/13)     | 92.3%<br>(12/13)   |         |
| <b>≥3 Metabolic Abnormalities, % (N/T)</b> | 26.1%<br>(87/333)                       | 31.0%<br>(27/87)   | 69.0%<br>(60/87)   | <0.001  |

Supplemental table 3:

| Subjects Stratified by ALT Group |                    |                   |                   |                  |         |                    |                    |                   |                  |         |  |  |
|----------------------------------|--------------------|-------------------|-------------------|------------------|---------|--------------------|--------------------|-------------------|------------------|---------|--|--|
|                                  | Boys               |                   |                   |                  |         |                    | Girls              |                   |                  |         |  |  |
|                                  | All Boys           | Normal            | Elevated          | 2xULN            | p-value | All Girls          | Normal             | Elevated          | 2xULN            | p-value |  |  |
| <b>Number of Patients</b>        | 296                | 135               | 119               | 42               |         | 333                | 170                | 133               | 30               |         |  |  |
| <b>Age Group, % (N/T)</b>        |                    |                   |                   |                  | 0.008   |                    |                    |                   |                  | 0.017   |  |  |
| <b>2-5</b>                       | 13.2%<br>(39/296)  | 17.0%<br>(23/135) | 13.4%<br>(16/119) | 0%<br>(0/42)     |         | 11.1%<br>(37/333)  | 7.6%<br>(13/170)   | 16.5%<br>(22/133) | 6.7%<br>(2/30)   |         |  |  |
| <b>6-9</b>                       | 24.7%<br>(73/296)  | 25.9%<br>(35/135) | 26.9%<br>(32/119) | 14.3%<br>(6/42)  |         | 32.1%<br>(107/333) | 27.6%<br>(47/170)  | 36.0%<br>(48/133) | 40.0%<br>(12/30) |         |  |  |
| <b>10+</b>                       | 62.2%<br>(184/296) | 57.0%<br>(77/135) | 59.7%<br>(71/119) | 85.7%<br>(36/42) |         | 56.8%<br>(189/333) | 64.7%<br>(110/170) | 47.4%<br>(63/133) | 53.3%<br>(16/30) |         |  |  |
| <b>Obesity Class, % (N/T)</b>    |                    |                   |                   |                  | 0.048   |                    |                    |                   |                  | <0.001  |  |  |
| <b>Class I</b>                   | 16.2%<br>(48/296)  | 22.2%<br>(30/135) | 11.8%<br>(14/119) | 9.5%<br>(9/42)   |         | 19.2%<br>(64/333)  | 27.1%<br>(46/170)  | 12.0%<br>(16/133) | 6.7%<br>(2/30)   |         |  |  |
| <b>Class II</b>                  | 27.7%<br>(82/296)  | 30.4%<br>(41/135) | 25.2%<br>(30/119) | 26.2%<br>(11/42) |         | 33.6%<br>(112/333) | 36.5%<br>(62/170)  | 28.6%<br>(38/133) | 40.0%<br>(12/30) |         |  |  |
| <b>Class III</b>                 | 56.1%<br>(166/296) | 47.4%<br>(64/135) | 63.0%<br>(75/119) | 64.3%<br>(27/42) |         | 47.1%<br>(157/333) | 36.4%<br>(62/170)  | 59.4%<br>(79/133) | 53.3%<br>(16/30) |         |  |  |
